# Supplementary material for: Dnmts and Tet target memory-associated genes after appetitive olfactory training in honey bees
Source: PubMed Central journal article supplement (PMC4632027; doi:10.1038/srep16223), 2015-11-04
Supplement: srep16223-s1.pdf [file srep16223-s1.pdf]

# *Dnmts* and *Tet* target memory-associated genes after appetitive olfactory training in honey bees

STEPHANIE D. BIERGANS<sup>1,2\*</sup>, C. GIOVANNI GALIZIA<sup>2</sup>, JUDITH REINHARD<sup>1</sup>, CHARLES CLAUDIANOS<sup>1,3</sup>

<sup>1</sup> Queensland Brain Institute, The University of Queensland, Australia

<sup>2</sup> Neurobiologie, Universität Konstanz, Germany

<sup>3</sup> Monash Institute of Cognitive and Clinical Neuroscience, Faculty of Biomedical and Psychological Sciences, Monash University, Australia

\*Corresponding author: [stephanie.biergans@uq.net.au](mailto:stephanie.biergans@uq.net.au)

## SUPPLEMENTAL MATERIALS

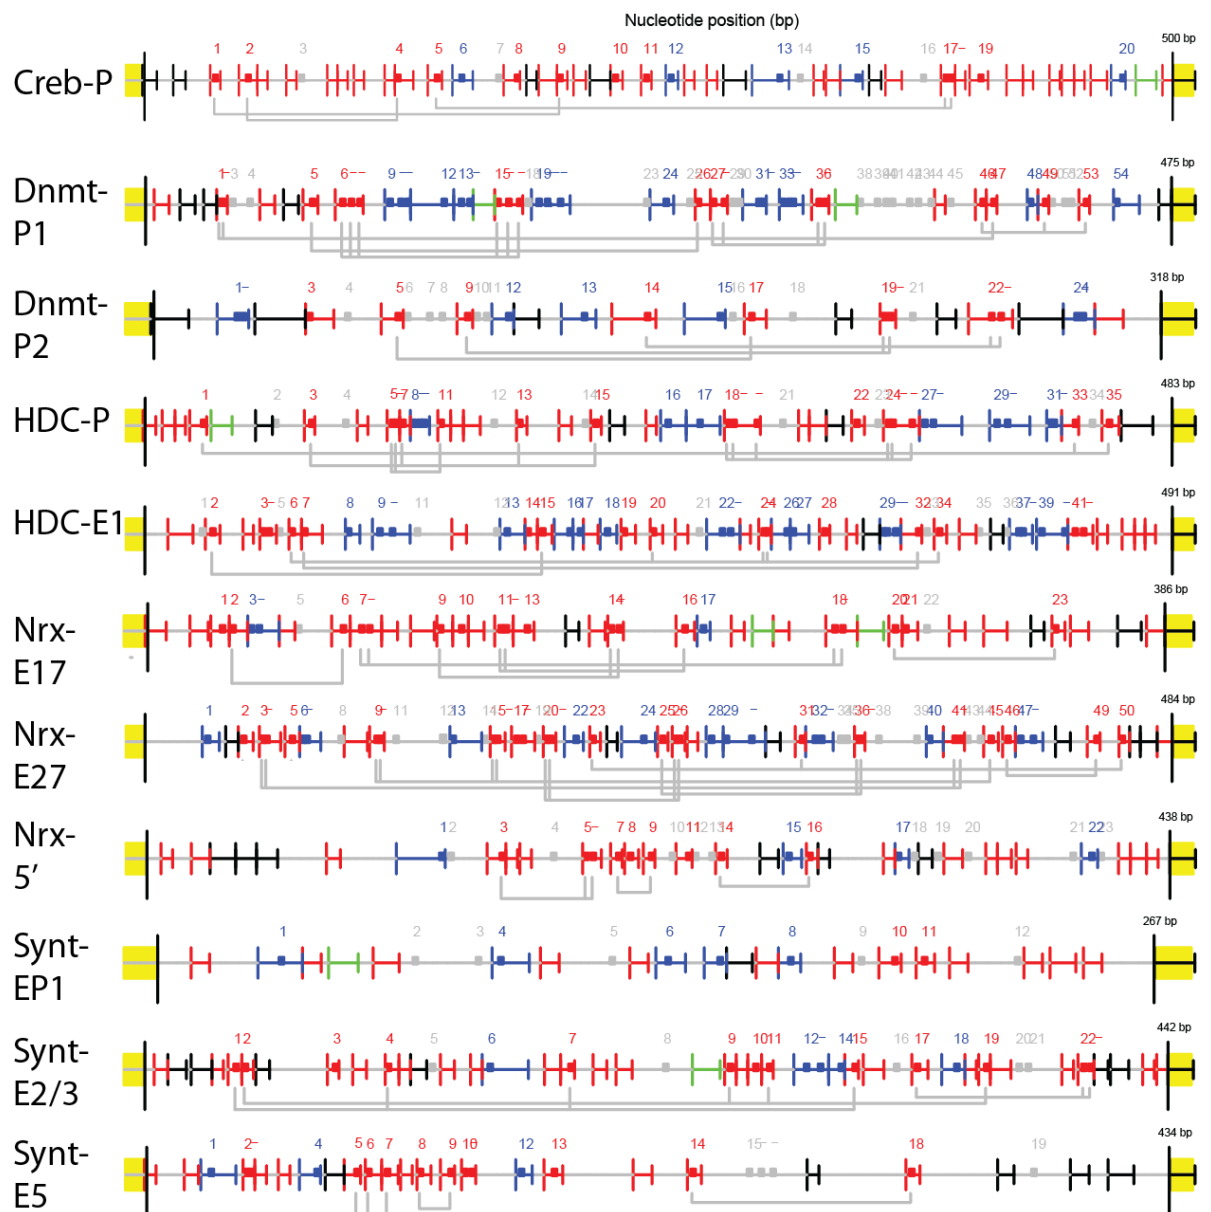

Figure S1 Amplicon prediction for Sequenome analysis. The amplicon prediction function of the MassArray R-pipeline was used (Thompson et al., 2009). Numbers represent CpG sites. Red indicates CpGs which cannot be analysed, because the respective fragment mass overlaps with another fragment. Grey CpGs are on fragments which are out of the measurable range. Blue CpGs can be analysed. Green parts are segments which were used for the conversion control analysis as they include non-CpG cytosines.

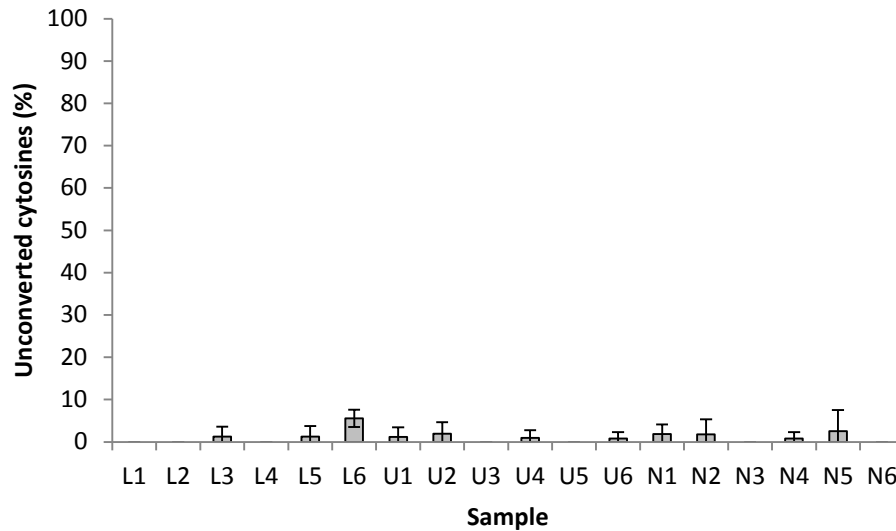

Figure S2 Bisulfite conversion control for Sequenome analysis. The conversion control pipeline of the MassArray R-pipeline was used (Thompson et al., 2009). For all amplicons conversion of non-CpG C's was assessed and pooled per sample. Mean and 95% confidence interval are presented. L= learner group; U= unpaired group; N = naïve group

Table S1 Fluidigm qPCR primer list

| Gene candidate                               | GB number (Assembly 4.0) | Forward primer             | Reverse primer        |
|----------------------------------------------|--------------------------|----------------------------|-----------------------|
| Actin                                        | 17681                    | TTCCCATCTATCGTCGGAAG       | CTCTCTTGATTGGGCTTCG   |
| Aldoreductase                                | 18109                    | TAGTCCCCTTGGATCACCTG       | TTGGGTCATCTGGTTTAGCC  |
| Asparaginesynthetase (ASNS)                  | 13219                    | TGGAATTTGGGCTCTTTTGG       | TTCTGGACCACGGTGTGTAA  |
| Histone acetyltransferase p300 (HAT p300)    | 10171                    | ACCAAGTGGAGGTCAACCTG       | ATATTGTGGGTGGGCAAGAA  |
| cAMP response element binding protein (CREB) | 11585                    | AATTGCAACCCAAGGTGAAG       | TCAGTATGCACAAGGCCAAG  |
| Cueball (cue)                                | 17323                    | CCAAAAAGACGGGAAAAATGA      | ACGCGTTAAAAATCCCACTTG |
| DNA methyltransferase 1a (DNMT1a)            | 19865                    | TGATCCAAAAACAGATGAGGA<br>A | TACAGCACCATTTCGGATGAC |
| DNA methyltransferase 1b (DNMT1b)            | 15130                    | GAAATTACATGGGTGGGAGAA      | GTCACTGCCTCTTCGAAACC  |
| DNA methyltransferase 2 (DNMT2)              | 10767                    | TGAGTCCTCCATGTCAACCTT      | GCCAAATTGACAAGGGCTTA  |
| DNA methyltransferase 3 (DNMT3)              | 14232                    | CCTCCAAGTGGACTTTGGAC       | ACGTTCCGGATTGTCCTTCAG |
| Ether a go-go (EAG)                          | 15597                    | GATGACCAAGGGCCTAGACA       | ATGCTCGTTGAACACCTTCC  |
| Glyceraldehyde-3-phosphate                   | 14798                    | GATGCACCCATGTTTGTGG        | TTTGCAGAAGGTGCATCAAC  |

|                                                           |       |                        |                       |
|-----------------------------------------------------------|-------|------------------------|-----------------------|
| dehydrogenase (GAPDH)                                     |       |                        |                       |
| GB18684                                                   | 18684 | TATTGTTGCTTCGGATCGTG   | CGGTGTTCTTTTTCCGATCT  |
| Histone 1B                                                | 12700 | GCTAAGAAGCCAGCAACACC   | TACCTTCGATGCGCTCTTTT  |
| Headcase (HDC)                                            | 11140 | ATCCGGGAAGAGGAAGTGAT   | TGTTCTCCATGGTGTCTGTGT |
| Histone 1.2                                               | 12218 | GCCAATCCAACAAAGAAAGC   | ATTGGTGACCCTCGTGATTT  |
| Heatshockprotein 90 (HSP90)                               | 14758 | GGCTGCCAAGAAGCATTAG    | AGCTTCAGCTTTTTGCCTCA  |
| cytoplasmic aconitate hydratase (Irp1)                    | 16072 | TATCGGAAAAGCTGGACCAC   | TATCGGAAAAGCTGGACCAC  |
| Molybdenum cofactor sulfurase (mal)                       | 18250 | CATCCTTGCTAATGCTTCACC  | GCAACAATTCCTCCTTGCAT  |
| molybdenum cofactor biosynthesis protein 1 (Mocs1)        | 11214 | TTGTATGCCAGCAGAAGGAA   | TTGGTTCACCACCAGTTAAGC |
| Mitochondrial ribosomal protein L35 (Mrpl35)              | 14476 | AACTTTTGCTGGCCGTCAT    | AACTTTTGCTGGCCGTCAT   |
| Nepriylsin 2(Nep2)                                        | 16619 | TTGAAGAACAGCACGAAACG   | ATAATCCAAGAGCGGCTTGA  |
| Neurexin I                                                | 13455 | CGGAGAACGCTGCCTTAATA   | TCAGAACAATGGCGATCAAC  |
| N-acetylneuraminatase (NPL)                               | 17289 | TAGTGAGGCAGCTCCAAACA   | CGAGGAATTCTCCCATGTGT  |
| Pyridoxamine 5'-phosphate oxidase (PPO)                   | 13619 | TGTGGAGGCAGAGCCTTAGT   | TACACCGTCGAAAAACTGA   |
| RNA-polymerase (Rpb8)                                     | 10191 | TATCCTGATGGAGGGGAGTG   | GGGTTTCATTGCTTCTTCAT  |
| Ribosomal protein L32 (RPL32)                             | 10903 | CGTAACCTTGCACTGGCATT   | TTGCTCATGGTGTGAGCAGT  |
| Regulatory particle non-ATPase 9 (RPN9)                   | 16614 | CAAGCTTTCAATGCTGGTGA   | CTTTGCTCCATTGTGGCTTT  |
| Sec61beta                                                 | 13924 | CCCAGCAAAGCTATAGCACCT  | TTCATCAGAACCAGCTCCTGT |
| Stress sensitive B (sesB)                                 | 17499 | TGATGTAGGCAAAGCTGGTG   | GGCAGCACGATAGATGATGA  |
| Synaptotagmin 1 (Synt)                                    | 20036 | CCAAACACGATCAGATCGGTG  | CTTCAGATCCGTACGTGAAGG |
| Ten-eleven translocation methylcytosine dioxygenase (Tet) | 13880 | TCACGAGCAAAAAGACACCTGG | ACATGTTTTCCGGCTTATCG  |

Table S2 Sequenome primer list

| Primer name      | Forward                                  | Reverse                                                        | Size (bp) |
|------------------|------------------------------------------|----------------------------------------------------------------|-----------|
| CREB Promotor    | aggaagagagTTGGTAAGTATT<br>TAGTTGGAGAATAA | cagtaatagactcactataggg<br>agaaggctAACATCATCAAA<br>ACAAATAATATC | 500       |
| Dnmt3 Promotor 1 | aggaagagagGAAATTTGGGAA<br>GAAAGTGGG      | cagtaatagactcactataggg<br>agaaggctAAAAATTCTCTT<br>CATCAAAAAAAC | 475       |
| Dnmt3 Promotor 2 | aggaagagagGTTTTTTTTGATG<br>AAGAGAATTTTT  | cagtaatagactcactataggg<br>agaaggctAAATTCTTACCT<br>AACCACCATCCC | 318       |

|                                    |                                            |                                                                   |     |
|------------------------------------|--------------------------------------------|-------------------------------------------------------------------|-----|
| HDC Promotor                       | aggaagagagGTTTAAAATTGT<br>TATTTGAAAGTGT    | cagtaatagactcactataggg<br>agaaggctCTATATTATCAC<br>ACACACACCCATT   | 483 |
| HDC Exon 1                         | aggaagagagGAAAAGTATAAG<br>GGTGTGTTTGATA    | cagtaatagactcactataggg<br>agaaggctTTCCTAATAACA<br>TCCAATCCAAATC   | 491 |
| Neurexin 1<br>exon/intron 17       | aggaagagagTTTGTAATAG<br>AGTATTTTGAATTT     | cagtaatagactcactataggg<br>agaaggctAAAACATATCCA<br>AACAAATTTCCCTAT | 386 |
| Neurexin 1<br>exon/intron 26       | aggaagagagGAAATTGAAAAA<br>GGAAAGTAATTAATAG | cagtaatagactcactataggg<br>agaaggctAAAACTAACA<br>AACTCACCTAAC      | 484 |
| Neurexin 1 5'end                   | aggaagagagGAGAAATTTGAT<br>TGAGGAATGTGTT    | cagtaatagactcactataggg<br>agaaggctTTCCTAACCTCA<br>AACCTCAAATATC   | 438 |
| Synaptotagmin 1<br>Promotor/exon 1 | aggaagagagATTTAAAGATGG<br>GAAGAAAGGATTG    | cagtaatagactcactataggg<br>agaaggctTTTTACCTTATA<br>TTAAAATTTCCCA   | 267 |
| Synaptotagmin 1<br>exon 2/3        | aggaagagagGGAATTGTTAGT<br>TTTGATATGGGT     | cagtaatagactcactataggg<br>agaaggctCCAATTCAAATT<br>TACCTAACCACT    | 442 |
| Synaptotagmin 1<br>exon 5          | aggaagagagGGTATATTAGAA<br>TTTATTGGGAAGG    | cagtaatagactcactataggg<br>agaaggctATTCTTTTCTCTC<br>ATAAAAAAACCTA  | 434 |

Table S3 p-values methylation site analysis

| Amplicon          | CpG         | LEARNING STIMULATION |              |              | Group            | Age          | Season       |
|-------------------|-------------|----------------------|--------------|--------------|------------------|--------------|--------------|
|                   |             | L~U                  | L~N          | U~N          |                  |              |              |
| Creb Promotor     | All         | 0.969                | 0.740        | 0.675        | 0.883            | 0.436        | 0.082        |
|                   | 6           | 0.432                | 0.136        | 0.397        | 0.111            | <b>0.010</b> | 0.696        |
|                   | 8           | 0.754                | 0.425        | 0.593        | 0.733            | 0.423        | 0.800        |
|                   | 10          | 0.244                | <b>0.018</b> | <b>0.086</b> | <b>0.006</b>     | 0.754        | 0.059        |
|                   | 11          | 0.919                | 0.338        | 0.352        | 0.535            | 0.320        | 0.612        |
|                   | 12          | 0.337                | 0.951        | 0.332        | 0.525            | 0.463        | 0.429        |
|                   | 13          | 0.587                | <b>0.017</b> | <b>0.023</b> | <b>&lt;0.001</b> | <b>0.072</b> | 0.920        |
|                   | 15          | 0.348                | 0.820        | 0.22         | 0.126            | 0.101        | <b>0.004</b> |
|                   | 19          | 0.863                | 0.311        | 0.358        | 0.241            | <b>0.014</b> | <b>0.058</b> |
|                   | 20          | 0.321                | 0.503        | 0.735        | 0.628            | 0.629        | 0.587        |
| Dnmt 3 Promotor 1 | All         | 0.106                | 0.608        | <b>0.054</b> | 0.115            | 0.705        | 0.982        |
|                   | 9.10.11     | 0.744                | 0.828        | 0.608        | 0.882            | 0.530        | 0.526        |
|                   | 12          | <b>0.071</b>         | 0.396        | 0.309        | 0.184            | 0.659        | 0.708        |
|                   | 13.14       | 0.265                | 0.207        | <b>0.037</b> | <b>0.015</b>     | <b>0.046</b> | 0.102        |
|                   | 19.20.21.22 | 0.252                | 0.614        | 0.131        | 0.193            | 0.203        | 0.178        |
|                   | 24          | 0.222                | 0.298        | <b>0.046</b> | 0.119            | 0.762        | 0.782        |
|                   | 31.32       | 0.757                | <b>0.042</b> | <b>0.031</b> | <b>0.031</b>     | 0.328        | 0.867        |
|                   | 33.34.35    | 0.692                | 0.321        | 0.559        | 0.569            | 0.253        | 0.323        |
|                   | 54          | 0.143                | 0.143        | 1            | 0.193            | 0.364        | 0.454        |
| Dnmt 3 Promotor 2 | All         | <b>0.045</b>         | <b>0.093</b> | 0.606        | <b>0.077</b>     | 0.524        | 0.694        |
|                   | 3           | 0.249                | 0.731        | 0.380        | 0.477            | 0.707        | 0.225        |
|                   | 11.12       | <b>0.092</b>         | 0.618        | 0.161        | 0.1850           | 0.457        | 0.787        |

|                               |            |                  |                  |              |                  |              |                  |
|-------------------------------|------------|------------------|------------------|--------------|------------------|--------------|------------------|
|                               | 13         | 0.259            | 0.455            | 0.763        | 0.465            | 0.696        | 0.188            |
|                               | 15         | <b>0.086</b>     | <b>0.006</b>     | 0.163        | <b>0.002</b>     | 0.387        | 0.281            |
|                               | 24.25      | <b>0.022</b>     | <b>0.046</b>     | 0.6059       | <b>0.003</b>     | 0.283        | <b>0.019</b>     |
| HDC Promotor                  | All        | 0.841            | 0.346            | 0.454        | 0.595            | 0.340        | 0.343            |
|                               | 8.9.10     | 1                | 1                | 1            | 1                | 0.464        | 0.534            |
|                               | 16         | <b>0.031</b>     | 0.109            | 0.506        | <b>0.071</b>     | 0.696        | 1                |
|                               | 17         | 0.835            | 0.533            | 0.677        | 0.828            | 0.511        | 0.908            |
|                               | 22         | 0.831            | 0.114            | 0.164        | 0.213            | 0.807        | 0.359            |
|                               | 27.28      | 0.169            | 0.770            | 0.113        | 0.165            | 0.821        | <b>0.048</b>     |
|                               | 29.30      | 0.121            | <b>0.093</b>     | 0.946        | 0.169            | 0.805        | 0.654            |
|                               | 31.32      | 0.868            | 0.679            | 0.804        | 0.918            | 0.298        | 0.704            |
|                               | HDC exon 1 | All              | 0.732            | 0.827        | 0.901            | 0.932        | <b>0.046</b>     |
| 3.4                           |            | 0.692            | 0.432            | 0.692        | 0.554            | 1            | <b>&lt;0.001</b> |
| 8                             |            | 1                | 1                | 1            | 1                | 1            | 1                |
| 9.10                          |            | 0.897            | 0.146            | 0.132        | 0.226            | 0.333        | 0.629            |
| 13                            |            | <b>0.018</b>     | <b>0.004</b>     | 0.428        | <b>0.002</b>     | 0.420        | 0.494            |
| 14                            |            | 0.143            | 0.292            | 0.772        | 0.328            | 0.926        | 0.957            |
| 16                            |            | 0.502            | <b>0.029</b>     | 0.106        | <b>0.060</b>     | 0.720        | 0.448            |
| 18                            |            | <b>0.003</b>     | <b>0.195</b>     | <b>0.051</b> | <b>0.003</b>     | 0.831        | 0.711            |
| 19                            |            | <b>0.079</b>     | 0.935            | <b>0.079</b> | <b>0.100</b>     | 0.240        | 0.683            |
| 22.23                         |            | <b>0.024</b>     | 0.342            | 0.119        | <b>0.049</b>     | 0.315        | 0.845            |
| 26                            |            | <b>&lt;0.001</b> | <b>&lt;0.001</b> | 0.218        | <b>&lt;0.001</b> | 0.146        | 0.769            |
| 27                            |            | 0.503            | 0.503            | 1            | 0.715            | 0.885        | <b>0.082</b>     |
| 28                            |            | 0.800            | 0.529            | 0.384        | 0.499            | <b>0.009</b> | 0.720            |
| 29.30                         |            | <b>0.064</b>     | <b>0.088</b>     | 0.797        | <b>0.099</b>     | 0.882        | 0.376            |
| 37.38                         |            | 0.189            | 0.189            | 1            | 0.221            | <b>0.041</b> | 0.385            |
| 39.40                         |            | 0.833            | 0.521            | 0.686        | 0.794            | 0.117        | 0.831            |
| 41.42                         | 0.141      | <b>0.073</b>     | 0.694            | 0.151        | 0.501            | 0.528        |                  |
| Neurexin 1 exon/<br>intron 17 | All        | <b>0.038</b>     | 0.104            | 0.687        | <b>0.004</b>     | 0.484        | <b>&lt;0.001</b> |
|                               | 1          | 0.399            | 0.343            | 0.870        | 0.610            | 0.794        | 0.523            |
|                               | 3.4        | 0.431            | 0.164            | 0.431        | 0.401            | 0.898        | 1                |
|                               | 10         | 0.124            | 0.112            | 0.734        | <b>0.053</b>     | 0.120        | <b>0.031</b>     |
|                               | 13         | 0.241            | 1                | 0.241        | 0.325            | 0.920        | 0.131            |
|                               | 21         | <b>0.050</b>     | <b>0.098</b>     | 0.826        | <b>0.002</b>     | 0.654        | <b>&lt;0.001</b> |
| Neurexin 1 exon/<br>intron 26 | All        | 0.246            | <b>0.017</b>     | 0.124        | <b>0.014</b>     | 0.584        | <b>0.060</b>     |
|                               | 1          | 0.457            | 0.379            | 0.121        | 0.305            | 0.636        | 0.969            |
|                               | 6.7        | 0.125            | 1                | 0.147        | <b>0.016</b>     | 1            | <b>&lt;0.001</b> |
|                               | 12         | 0.151            | 0.114            | 0.810        | 0.176            | 0.682        | 0.158            |
|                               | 13         | 0.721            | <b>0.039</b>     | <b>0.050</b> | <b>0.031</b>     | 0.419        | 0.209            |
|                               | 17.18      | 0.558            | 0.126            | <b>0.034</b> | <b>0.060</b>     | 0.681        | 0.225            |
|                               | 22         | 0.718            | 0.441            | 0.652        | 0.634            | 0.542        | <b>0.007</b>     |
|                               | 24         | 0.467            | <b>0.015</b>     | <b>0.039</b> | <b>0.006</b>     | 0.888        | 0.204            |
|                               | 28         | 0.823            | 0.301            | 0.379        | 0.554            | 0.502        | 0.609            |
|                               | 29.30      | 0.120            | 0.503            | 0.323        | 0.169            | 0.443        | <b>0.088</b>     |
|                               | 32.33      | 0.115            | 0.510            | 0.328        | 0.137            | <b>0.048</b> | 0.121            |
| 40                            | 0.307      | 0.070            | 0.268            | 0.175        | 0.560            | 0.956        |                  |
| 47.48                         | 0.971      | 0.773            | 0.708            | 0.927        | 0.838            | 0.346        |                  |
| Neurexin 1 5' end             | All        | 0.194            | 0.160            | 0.845        | 0.199            | 0.182        | 0.219            |
|                               | 1          | 0.340            | 0.267            | 0.827        | 0.282            | <b>0.007</b> | 0.306            |
|                               | 8          | 0.594            | 0.155            | 0.352        | 0.289            | 0.254        | 0.215            |
|                               | 11         | <b>0.027</b>     | 0.124            | 0.508        | <b>0.040</b>     | 0.471        | 0.339            |
|                               | 15         | 0.328            | 0.709            | 0.591        | 0.601            | 0.693        | 0.213            |
|                               | 17         | 0.171            | 0.516            | 0.484        | 0.213            | <b>0.011</b> | 0.531            |
|                               | 22         | 0.370            | 0.535            | 0.751        | 0.639            | 0.331        | 0.703            |

|                                            |       |              |              |              |              |              |              |
|--------------------------------------------|-------|--------------|--------------|--------------|--------------|--------------|--------------|
| Synaptotagmin 1<br>exon/ intron 2<br>and 3 | All   | 0.141        | 0.517        | 0.388        | 0.270        | <b>0.092</b> | 0.574        |
|                                            | 3     | 0.391        | 0.280        | 0.061        | 0.155        | 0.740        | 0.612        |
|                                            | 6     | 0.479        | <b>0.031</b> | <b>0.093</b> | <b>0.004</b> | <b>0.028</b> | <b>0.030</b> |
|                                            | 10    | 0.131        | 0.131        | 1            | 0.235        | 0.612        | 0.570        |
|                                            | 12.13 | 0.233        | 0.170        | 0.774        | 0.374        | 0.947        | 0.582        |
|                                            | 14    | 0.292        | 0.547        | 0.676        | 0.513        | 0.114        | 0.332        |
|                                            | 18    | 0.232        | 0.283        | 0.924        | 0.278        | <b>0.051</b> | <b>0.079</b> |
| Synaptotagmin 1<br>Exon/ intron 5          | All   | 0.690        | 0.705        | 0.998        | 0.903        | 0.261        | 0.815        |
|                                            | 1     | 0.718        | 0.404        | 0.250        | 0.507        | 0.577        | 0.387        |
|                                            | 2.3   | 0.116        | 0.320        | 0.584        | 0.299        | 0.972        | 0.777        |
|                                            | 4     | 0.401        | 0.174        | 0.554        | 0.387        | 0.457        | 0.738        |
|                                            | 10.11 | 0.134        | 0.766        | 0.357        | 0.292        | 0.519        | 0.964        |
|                                            | 12    | 0.923        | 0.658        | 0.555        | 0.812        | 0.234        | 0.293        |
|                                            | 13    | 1            | 0.111        | 0.181        | <b>0.045</b> | 0.686        | <b>0.017</b> |
| Synaptotagmin 1<br>Promotor and<br>exon 1  | All   | 0.687        | 0.345        | 0.167        | 0.348        | 0.260        | 0.887        |
|                                            | 1     | <b>0.023</b> | 0.112        | 0.389        | <b>0.032</b> | 0.444        | 0.165        |
|                                            | 4     | 0.204        | 0.103        | 0.630        | 0.184        | 0.132        | 0.921        |
|                                            | 6     | 0.689        | 0.689        | 1            | 0.895        | 1            | 0.104        |
|                                            | 7     | 0.295        | 0.126        | 0.594        | 0.305        | 0.737        | 0.796        |
|                                            | 8     | 0.177        | 1            | 0.152        | 0.172        | 0.123        | 0.253        |
|                                            | 10    | 0.640        | 0.369        | 0.162        | 0.334        | 0.246        | 0.563        |
